# Supplementary material for: Cathepsins Trigger Cell Death and Regulate Radioresistance in Glioblastoma
Source: MDPI journal article supplement (doi:10.3390/cells11244108), 2022-12-17
Supplement: s1 [file s1]

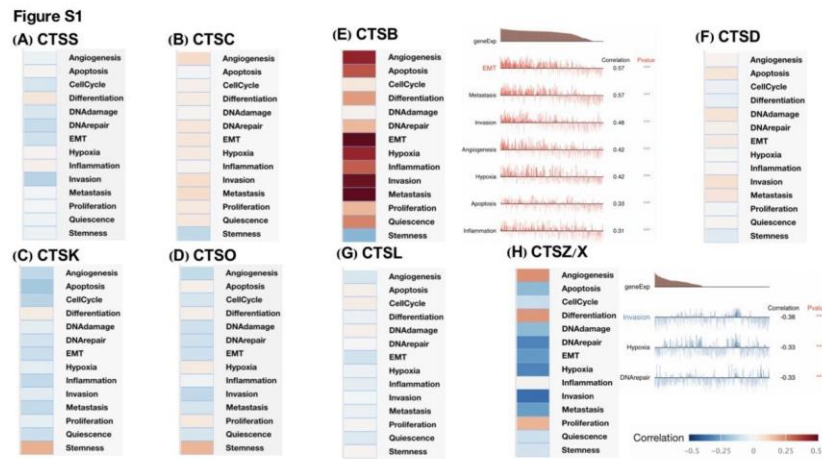

**Supplementary Figure1.** The relationship between cathepsins and different functional states of GBM was explored based on the CancerSEA database. \* $p < 0.05$ ; \*\* $p < 0.01$ ; \*\*\* $p < 0.001$ . Bar graphs show the number of datasets where cathepsins are significantly associated with the corresponding state. Red indicates positive correlation, blue indicates negative correlation.

**Figure S2**

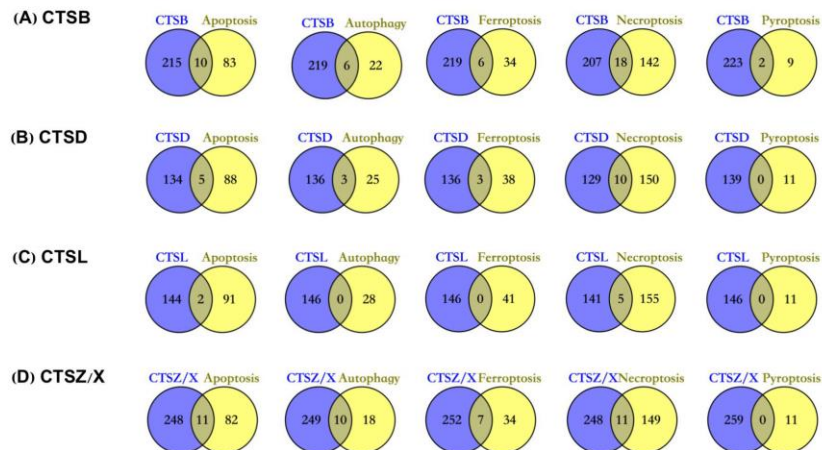

**Supplementary Figure2.** Intersection of interacting proteins of CTSB, CTSD, CTSL and CTSZ/X with cell death-related genes.
